# Supplementary material
Source: Research Square preprint supplement (doi:10.21203/rs.3.rs-9670968/v1)
Supplement: Supplementary file 1 [file 56d32b19b84f39a9b9c1dbf8.docx]

**Supplementary data**

**Sentinel lymph node in non-small cell lung cancer: long-term outcomes and immunopathological consequences**

Florent Stasiak, Loïc Reppel, Mickael Schaeffer, Guillaume Gauchotte, Arthur Streit, Joëlle Siat, Lucie Schnedecker, Joseph Seitlinger, Stéphane Renaud

**IHC protocol**

To prepare the slides, the paraffin blocks were cooled in the freezer for 10 to 15 minutes to harden the paraffin, making it easier to cut with the microtome. Once cooled, seven slides per block were prepared using the microtome, with a cut thickness of between 3 and 5 micrometres.

HES staining was performed on a Coverstainer automated system (Agilent®, Santa Clara, United States) according to the steps detailed in Table 1. For IHC, the blocks were cut to 4 µm, then the slides were dried in an oven at 56°C for 45 minutes, fixed in 10% buffered formalin and then passed through the DAKO Omnis automated system (Agilent®). The antibody clones used and the protocols employed are shown in Table 2.

*Table 1. HES staining protocol on Coverstainer automated system*

| Station | Dye | Time |
| --- | --- | --- |
| 1 | XYLENE | 3 min |
| 2 | XYLENE | 3 min |
| 3 | ALCOHOL 100 | 10 sec |
| 4 | ALCOHOL 100 | 2 min |
| 5 | ALCOHOL 100 | 2 min |
| 6 | WATER | 1 min |
| 7 | HEMATOX | 10 min |
| 8 | WATER | 1 min |
| 9 | BLUING BUFFER | 1 min |
| 10 | WATER | 1 min |
| 11 | ALCOHOL 100 | 1 min |
| 12 | EOSIN | 2 min |
| 13 | ALCOHOL 100 | 30 sec |
| 14 | SAFRAN | 1 min |
| 15 | ALCOHOL 100 | 1 min |
| 16 | ALCOHOL 100 | 1 min |
| 17 | XYLENE | 2 min |

*Table 2. Clones and IHC protocols for DAKO Omnis automated systems*

| **Antibodies** | **Supplier** | **Clone** | **Dilution** | **Protocol** | |
| --- | --- | --- | --- | --- | --- |
|  |  |  |  | **pH** | **Antibody incubation time** |
| **CD 20** | Agilent® | L26 | Ready to use | High | 12 min 30 |
| **CD3** | Agilent® | Polyclonal | Ready to use | Low | 20 min |
| **CD4** | Agilent® | 4B12 | Ready to use | High | 20 min |
| **CD8** | Agilent® | C8/14413 | Ready to use | High | 10 min |
| **CD56** | Agilent® | 123C3 | Ready to use | High | 20 min |

**CMF protocol**

**Antibodies and fluorochromes**

- Basal panel: CD45 VioBlue (130-110-637) for leukocytes, CD235a (Glycophorin A) FITC (130-117-688) for erythrocytes, CD3 PE (130-113-139) for T lymphocytes, CD19 PerCP-Vio700 (130-113-648) for B lymphocytes, CD11b PE-Vio770 (130-110-555) for monocytes, CD56 APC (130-113-310) for NK cells, CD66b APC-Vio770 (130-120-060) for granulocytes.

- ‘T lymphocyte’ panel: CD45RO VioBlue (130-119-620) for identification of memory/naive cells, CD4 FITC (130-114-722) for CD4 T lymphocytes, CD8 APC Vio770 (130-110-819) for CD8 T lymphocytes, CD279 PD-1 PE (130-120-388) for PD-1 labelling, CD11c PerCP-Vio700 (130-128-716) for dendritic cells, CD127 PE-Vio770 (130-113-977) and CD25 APC (130-113-846) for Treg lymphocytes.

- Memory panel: CD45 PE (130-110-632) for leukocytes, CD3 FITC (130-113-138) for T lymphocytes, CD4 PeVio770 (130-113-227) for CD4 T lymphocytes, CD8 APC Vio770 (130-110-681) for CD8 T lymphocytes, CD95 APC (130-113-005), CD45Ra VioGreen (130-113-369) and CCR7 VioBlue (130-117-353) for memory phenotypes.

**Immunophenotyping protocol**

- Double filtration using 70μm filters (Pre-Separation Filters, 70μm, 130-095-823) and 30μm (Pre-Separation Filters, 30μm, 130-041-407) in 15mL Falcon® tubes to remove tissue fragments and aggregates.

- Centrifugation of tubes at 400G for 10 minutes.

- Removal of the supernatant, then dissociation of the pellets with 300μL of PBS.

- Transfer of 100μL per cytometry tube.

- Preparation of the antibody mix in a cone for each panel: 4μL of each antibody with 4μL of PBS. For the ‘basal’ and ‘T lymphocyte’ panels, addition of 4μL of Viobility 405/520 Fixable Dye (130-130-404) to assess cell viability. For the ‘memory’ panel, 5μL of 7-AAD Staining Solution (130-111-568) is added 5 minutes before passing through the cytometer as a viability marker. A quantity of 8μL of the antibody mix is added to the corresponding tubes according to the panels.

- Incubation of the tubes for 15 minutes at room temperature and in the dark.

- Washing of the tubes with 1 mL of PBS, then centrifugation for 10 minutes at 400G.

- Removal of the supernatant and addition of 100 μL of PBS to each tube.

- Run through the flow cytometer.
